# Supplementary material for: Hydrophilic modification of PVDF porous membrane via a simple dip-coating method in plant tannin solution
Source: Royal Society of Chemistry journal article supplement (doi:10.1039/c6ra13634f), 2016-01-01
Supplement: c6ra13634f1.pdf [file c6ra13634f1.pdf]

## Supporting information

### **Hydrophilic Modification of PVDF Porous Membrane via a Simple Dip-coating Method in Plant Tannin Solution**

Songfeng Zhang, Lili Wu, Feirong Deng, Depeng Zhao, Chao Zhang, Chaocan Zhang

School of Materials Science and Engineering, Wuhan University of Technology, Wuhan 430070, PR China

Corresponding author:

Name: Lili Wu

E-mail: [polym\\_wl@whut.edu.cn](mailto:polym_wl@whut.edu.cn)

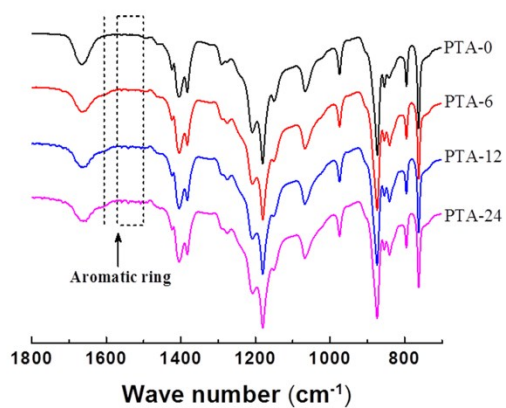

**Figure S1.** ATR-FTIR spectra of modified and unmodified PVDF membranes.

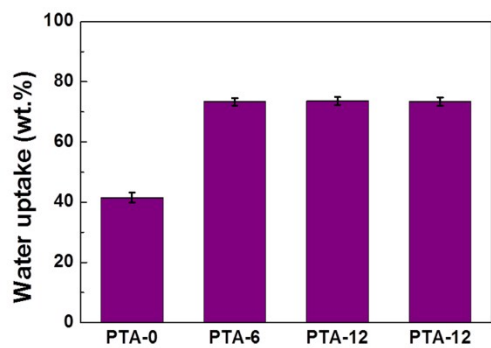

**Figure S2.** Water uptake content of modified and unmodified PVDF membranes.
